# Supplementary material
Source: MDPI journal article supplement (https://www.mdpi.com/2079-6412/5/3/527)
Supplement: s1 [file s1]

## Supplementary Materials

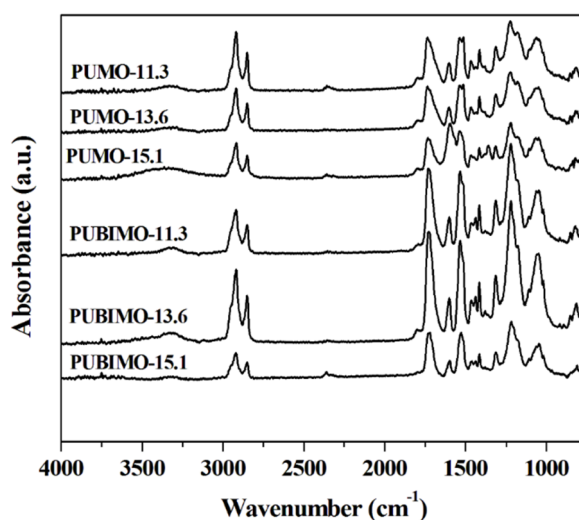

**Figure S1.** FTIR spectra of PUMO-11.3, PUMO-13.6, PUMO-15.1, PUBIMO-11.3, PUBIMO-13.6, and PUBIMO-15.1.

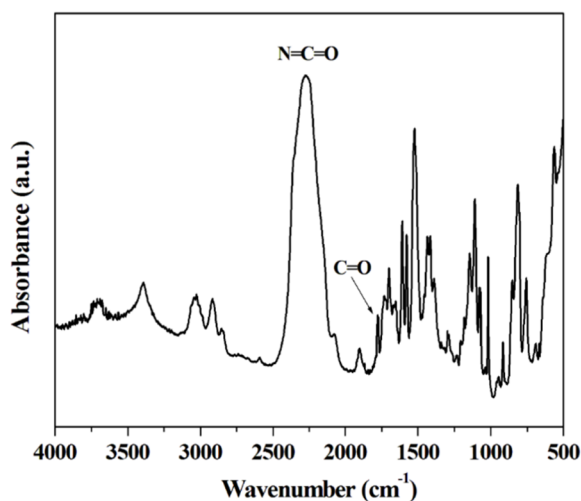

**Figure S2.** FTIR spectrum of MDI.
